# Supplementary material for: Lignite-derived carbon quantum dot/TiO2 heterostructure nanocomposites: photoinduced charge transfer properties and enhanced visible light photocatalytic activity
Source: Royal Society of Chemistry journal article supplement (doi:10.1039/c9nj04860j), 2019-01-01
Supplement: c9nj04860j1.pdf [file c9nj04860j1.pdf]

## Supporting information

### Lignite Derived Carbon Quantum Dots/TiO<sub>2</sub> Heterostructure Nanocomposites: Photoinduced Charge Transfer Property and Enhanced Visible Light Photocatalytic Activity

Jia Yu, Chuanxiang Zhang,\* Yulin Yang,\* Guiyun Yi, Ruiqing Fan, Liang Li, Baolin Xing, Quanrun Liu, Jianbo Jia, Guangxu Huang

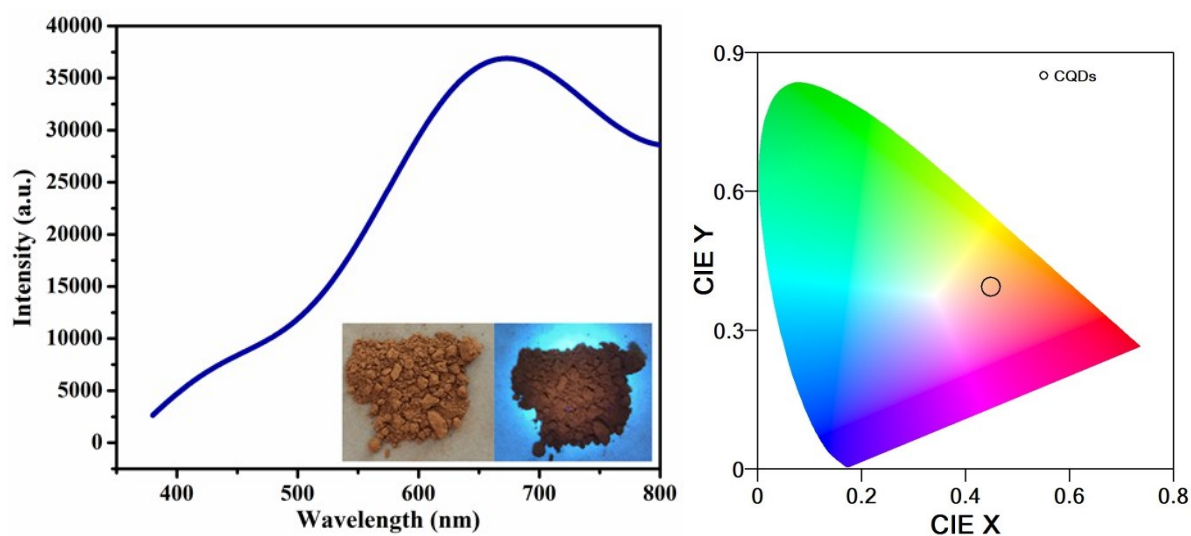

**Fig. S1** Fluorescence emission spectrum of lignite derived CQDs powder and the corresponding CIE spectra, excited at 350 nm. Inset: photographs of lignite derived CQDs under day light (left) and UV light of 365 nm (right).

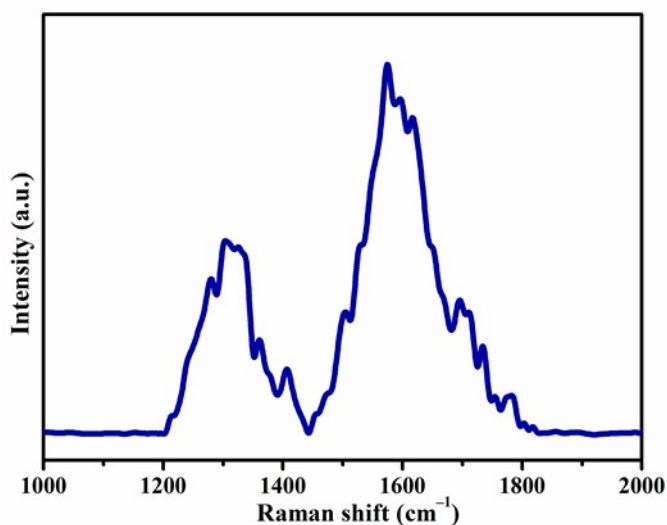

**Fig. S2** Raman spectra of lignite derived CQDs.

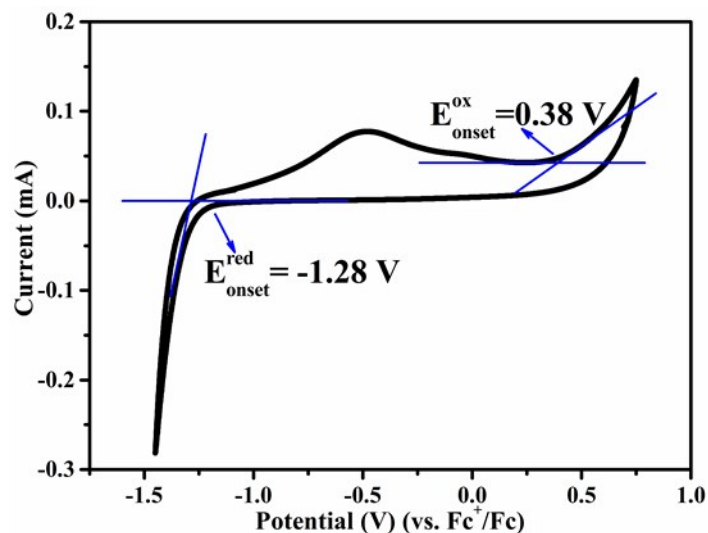

**Fig. S3** CV curve of the lignite derived CQDs electrode in 0.1 M TBAPF6 in DMF with a scan rate of 100 mV/s.

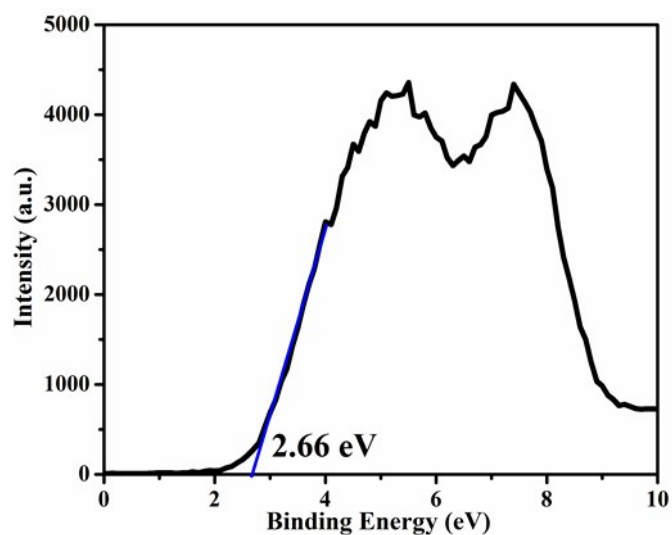

**Fig. S4** XPS valence band spectrum of  $\text{TiO}_2$

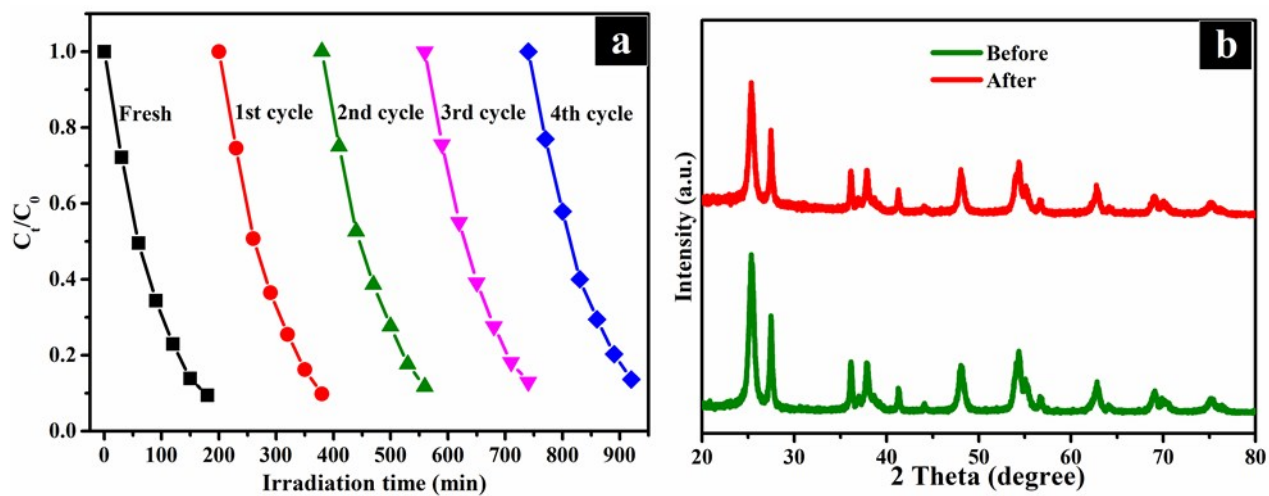

**Fig. S5** (a) Cycle experiments for photocatalytic degradation RhB under visible light, (b) XRD patterns of 2 wt% CQDs/ $\text{TiO}_2$ , before and after four cycles.
